# Supplementary material for: Construction of highly energetic metal–organic frameworks with a nitrobenzene derivative
Source: Royal Society of Chemistry journal article supplement (doi:10.1039/d2ce00464j), 2022-01-01
Supplement: d2ce00464j1.pdf [file d2ce00464j1.pdf]

## Electronic Supplementary Information

### Construction of highly energetic metal-organic frameworks with a nitrobenzene derivative

Zhihui Zong, Feiya Zhou, Qinghua Chang, Jingyi Shen, Shan Wang and Lili Liang\*

Department of Chemistry, Bengbu Medical College, Bengbu 233030, P. R. China.

E-mail address:

c112162@163.com

#### Contents:

1. General procedures
2. TableS1 Selected Bond Lengths (Å) and Bond Angles (°) in **1-3**.

**General procedures:** All reagents and solvents were of the analytical reagent grade and used without further purification. C, H and N analyses were made on an Elementar Vario-EL CHNS elemental analyzer. Fourier transform infrared spectra were obtained on a NICOLET iS 50 spectrometer with sample prepared as KBr discs in the range of 4000–400  $\text{cm}^{-1}$ . Powder X-ray diffraction (PXRD) patterns of samples **1-3** were collected on a Bruker D8 ADVANCE X-Ray Diffractometer (Cu-K $\alpha$ ,  $\lambda = 1.54056 \text{ \AA}$ ) in the in the  $2\theta$  range of 5-50° with a scan speed of 0.2 sec/deg. Thermogravimetical analyses (TGA) were performed in N<sub>2</sub> atmosphere on a simultaneous STA 449-F5 thermal analyzer from 25 °C up to 800 °C with a heating rate of 5-20 °C/min.

**Table S1** Selected Bond Lengths (Å) and Bond Angles (°) in **1-3**

| 1             |            |                  |            |                 |            |
|---------------|------------|------------------|------------|-----------------|------------|
| Cd1-O2        | 2.326(3)   | Cd1-O9           | 2.185(3)   | Cd1-O10         | 2.239(3)   |
| O9-Cd1-O2     | 96.81(10)  | O10-Cd1-O2       | 160.28(10) | O11-Cd1-O2      | 82.45(10)  |
| O2-Cd1-O2     | 69.89(10)  | O9-Cd1-O3        | 87.87(10)  | O10-Cd1-O3      | 91.95(10)  |
| O11-Cd1-O3    | 175.19(10) | O2-Cd1-O3        | 68.46(9)   | O2-Cd1-O3       | 97.23(10)  |
| 2             |            |                  |            |                 |            |
| Cud1-O11A     | 1.958(4)   | Cu1-O6           | 2.385(4)   | Cu2-O12B        | 1.829(10)  |
| Cu2-O12A      | 1.932(11)  | Cu2-O9           | 1.943(7)   | Cu2-O9          | 1.961(7)   |
| 2.003(11)     | 2.003(11)  | Cu2-O12B         | 2.048(10)  |                 |            |
| O2-Cu1-O2     | 180.0      | O2-Cu1-O11A      | 88.58(16)  | O2-Cu1-O11A     | 91.42(16)  |
| O2-Cu1-O11A   | 88.58(16)  | O11A-Cu1-O11A    | 180.0      | O3-Cd1-O1       | 113.09(13) |
| O2-Cu1-O6     | 101.07(15) | O2-Cu1-O6        | 78.93(15)  | O11A-Cu1-O6     | 94.60(15)  |
| O11A-Cu1-O6   | 85.40(15)  | O2-Cu1-O6        | 101.07(15) | O6-Cu1-O6       | 180.0      |
| O12B-Cu2-O12A | 19.1(3)    | O12B-Cu2-O9      | 92.2(4)    | O12A-Cu2-O9     | 94.7(4)    |
| O9-Cu2-O9     | 165.53(14) | O12B-Cu2-O12A    | 174.0(4)   | O12A-Cu2-O12A   | 165.78(16) |
| O12A-Cu2-O9   | 84.2(4)    | O12A-Cu2-O9      | 92.0(4)    | O12B-Cu2-O12B   | 166.9(2)   |
| O12A-Cu2-O12B | 148.0(3)   | O9-Cu2-O12B      | 86.8(4)    | O9-Cu2-O12B     | 85.3(4)    |
| 3             |            |                  |            |                 |            |
| Nd1-O2B       | 2.325(5)   | O2A-Nd1-O9A#1    | 133.72(16) | O10B#2-Nd1-O11C | 69.5(4)    |
| Nd1-O2A       | 2.390(5)   | O11A-Nd1-O9A#1   | 81.94(18)  | O2B-Nd1-O3A     | 136.76(17) |
| Nd1-O11A      | 2.397(5)   | O11B-Nd1-O9A#1   | 73.84(17)  | O2A-Nd1-O3A     | 63.94(15)  |
| Nd1-O11B      | 2.429(5)   | O2B-Nd1-O10B#2   | 143.38(19) | O11A-Nd1-O3A    | 66.37(16)  |
| Nd1-O9A#1     | 2.441(5)   | O2A-Nd1-O10B#2   | 86.74(16)  | O11B-Nd1-O3A    | 134.15(16) |
| Nd1-O10B#2    | 2.444(4)   | O11A-Nd1-O10B#2  | 135.31(16) | O9A#1-Nd1-O3A   | 69.78(15)  |
| Nd1-O11X      | 2.47(3)    | O11B-Nd1-O10B#2  | 76.02(17)  | O10B#2-Nd1-O3A  | 69.45(16)  |
| Nd1-O11C      | 2.521(14)  | O9A#1-Nd1-O10B#2 | 76.98(16)  | O11X-Nd1-O3A    | 124.0(8)   |
| Nd1-O3A       | 2.685(5)   | O2B-Nd1-O11X     | 67.3(8)    | O11C-Nd1-O3A    | 120.0(4)   |
| Nd1-O3B       | 2.781(5)   | O2A-Nd1-O11X     | 71.2(8)    | O2B-Nd1-O3B     | 62.89(16)  |
| O9A-Nd1#3     | 2.441(5)   | O11A-Nd1-O11X    | 135.9(8)   | O2A-Nd1-O3B     | 139.26(16) |
| O10B-Nd1#4    | 2.444(4)   | O11B-Nd1-O11X    | 73.4(8)    | O11A-Nd1-O3B    | 68.45(17)  |
| O2B-Nd1-O2A   | 86.55(17)  | O9A#1-Nd1-O11X   | 141.8(8)   | O11B-Nd1-O3B    | 66.51(17)  |
| O2B-Nd1-O11A  | 78.48(18)  | O10B#2-Nd1-O11X  | 76.5(8)    | O9A#1-Nd1-O3B   | 67.73(15)  |
| O2A-Nd1-O11A  | 80.08(18)  | O2B-Nd1-O11C     | 74.2(5)    | O10B#2-Nd1-O3B  | 133.89(16) |
| O2B-Nd1-O11B  | 88.46(18)  | O2A-Nd1-O11C     | 72.0(4)    | O11X-Nd1-O3B    | 115.0(8)   |

|               |            |                |          |              |            |
|---------------|------------|----------------|----------|--------------|------------|
| O2A-Nd1-O11B  | 143.32(17) | O11A-Nd1-O11C  | 141.7(5) | O11C-Nd1-O3B | 119.2(4)   |
| O11A-Nd1-O11B | 134.17(18) | O11B-Nd1-O11C  | 71.7(5)  | O3A-Nd1-O3B  | 120.72(15) |
| O2B-Nd1-O9A#1 | 130.56(16) | O9A#1-Nd1-O11C | 136.4(5) |              |            |

---

Symmetry codes: #1  $x+1/2, y-1/2, z$  #2  $x-1, -y+1, z-1/2$  #3  $x-1/2, y+1/2, z$  #4  $x+1, -y+1, z+1/2$
